# Supplementary material for: Construction of a dual-channel mode for wide spectrum-driven photocatalytic H2 production
Source: Royal Society of Chemistry journal article supplement (doi:10.1039/c8ta08914k), 2018-12-08
Supplement: c8ta08914k1.pdf [file c8ta08914k1.pdf]

## Electronic Supplementary Information (ESI)

### Construction of dual-channel mode for wide-spectrum-driven photocatalytic H<sub>2</sub> production

Lulu Zhang,<sup>a</sup> Hongwen Zhang,<sup>a</sup> Bo Wang,<sup>a</sup> Xueyan Huang,<sup>a</sup> Fan Gao,<sup>a</sup>  
Yan Zhao,<sup>a</sup> Sunxian Weng <sup>\*b</sup> and Ping Liu<sup>\*a</sup>

<sup>a</sup> *Research Institute of Photocatalysis, State Key Laboratory of Photocatalysis on Energy and Environment, Fuzhou University, Fuzhou 350002, PR China.*

<sup>b</sup> *State Grid Fujian Electric Power Research Institute, Fuzhou, 350002, P. R. China.*

*\*Corresponding author. Tel.: +86-591-22865876; fax: +86-591-2286-5876; E-mail: [liuping@fzu.edu.cn](mailto:liuping@fzu.edu.cn).*

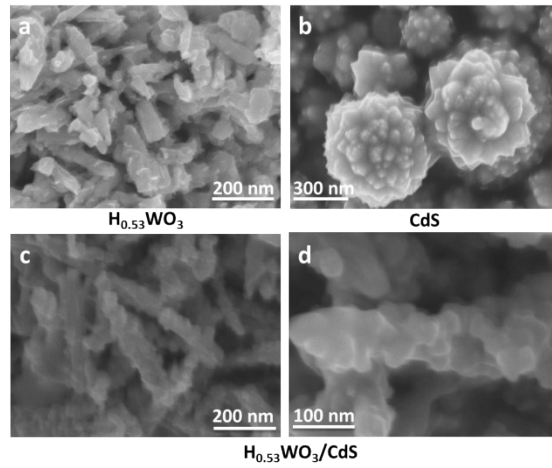

Fig. S1. SEM patterns of the samples (a)  $H_{0.53}WO_3$ , (b) CdS and (c,d)  $H_{0.53}WO_3/CdS$ .

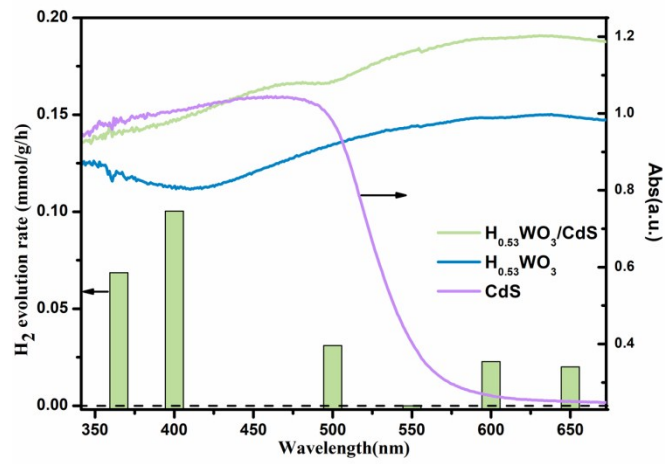

Fig. S2. Wavelength dependence of activity of  $H_{0.53}WO_3/CdS$ .

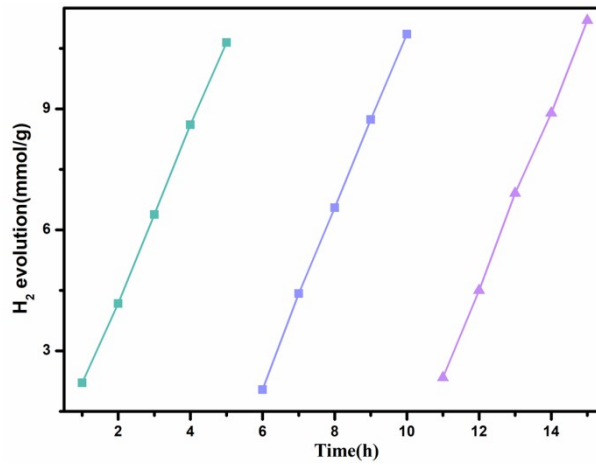

Fig. S3. Time-circle photocatalytic  $H_2$  evolution rate on  $H_{0.53}WO_3/CdS$ .

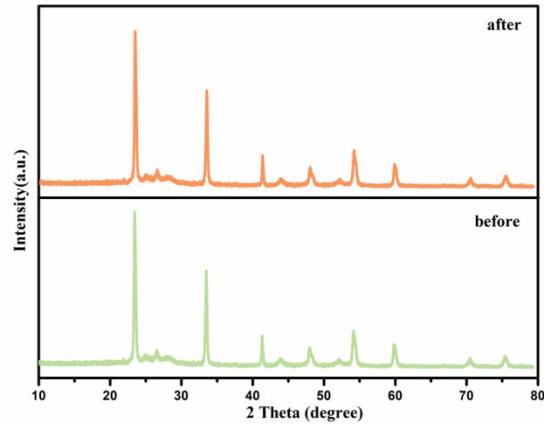

Fig. S4. XRD pattern of  $H_{0.53}WO_3/CdS$  before and after 15 hour cycling test.

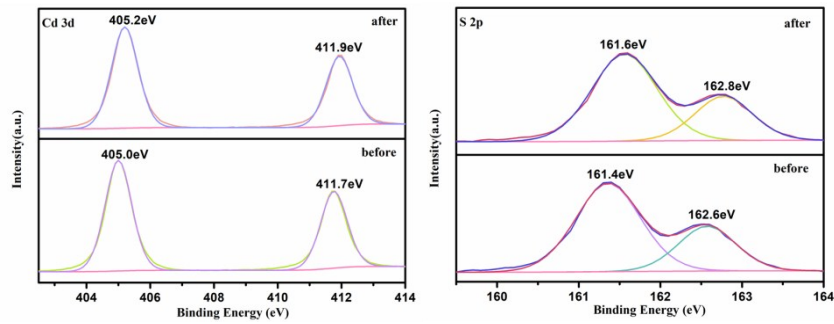

Fig. S5. Cd 3d (a) and S 2p (b) XPS spectra of  $H_{0.53}WO_3/CdS$  before and after 15 hour cycling test.

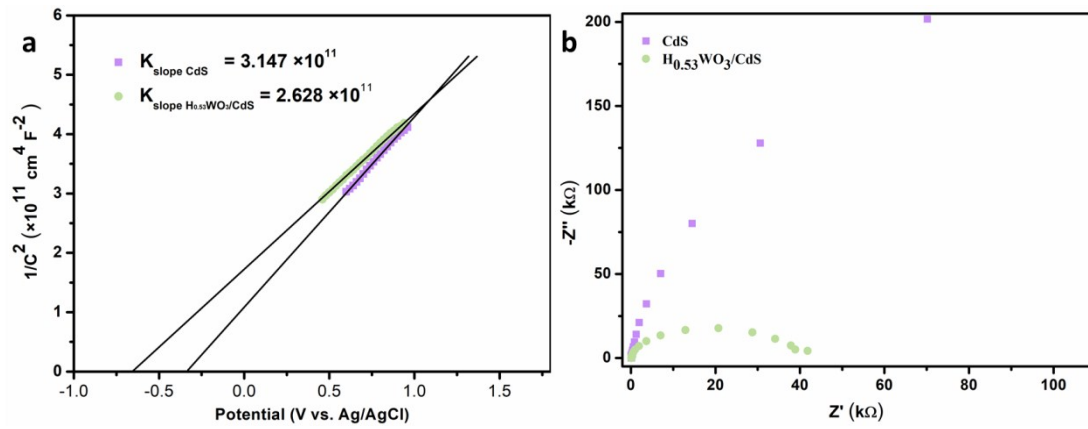

Fig. S6. (a) Mott-Schottky plots of CdS and  $H_{0.53}WO_3/CdS$ . (b) photo-electrochemical impedance spectra of

CdS and  $H_{0.53}WO_3/CdS$ .

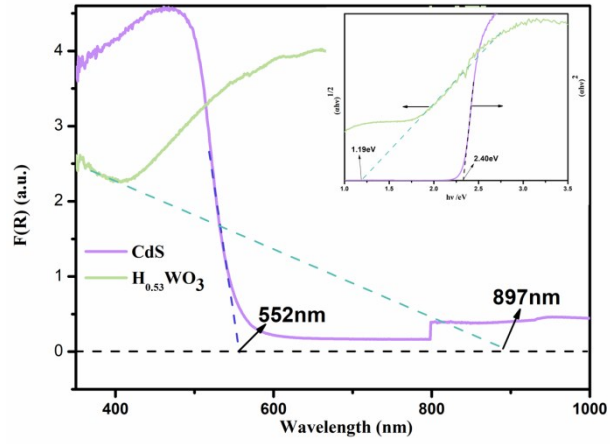

Fig. S7. UV-vis diffuse reflectance spectrum of CdS and  $H_{0.53}WO_3$ . Inset is Tauc's Plots of the  $(\alpha hv)^2$  vs photon energy ( $hv$ ) for CdS, plots of the  $(\alpha hv)^{1/2}$  vs photon energy ( $hv$ ) for  $H_{0.53}WO_3$ .

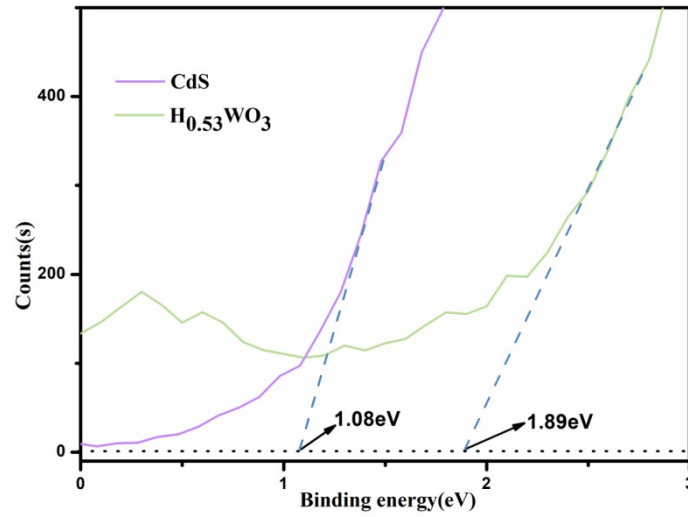

Fig. S8. XPS valence band spectra of CdS and  $H_{0.53}WO_3$ .

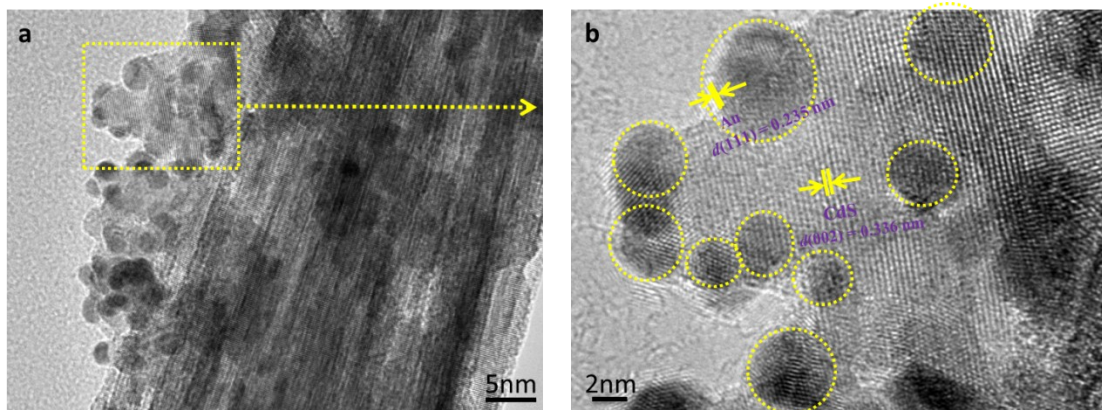

Fig. S9. TEM patterns of the sample  $H_{0.53}WO_3/CdS-Au$ .

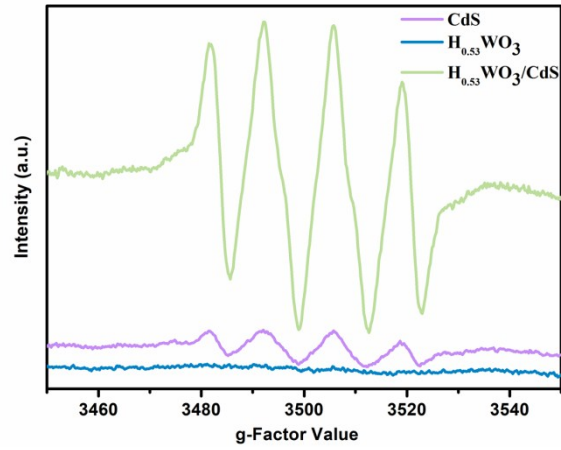

Fig. S10. Room-temperature ESR spectra of the as-prepared samples.

Table S1. Fermi level difference ( $\Delta E_F$ ) between CdS and  $H_{0.53}WO_3$  measured by OCP technique in 0.5M  $Na_2SO_4$  solution.

| Samples        | $E_F$ (eV) |
|----------------|------------|
| $H_{0.53}WO_3$ | -0.015     |
| CdS            | -0.605     |
| $\Delta E_F$   | +0.59      |

Table S2. The specific surface area of  $H_{0.53}WO_3$ , CdS and  $H_{0.53}WO_3/CdS$ .

| Samples            | $S_{BET}[m^2g^{-1}]$ |
|--------------------|----------------------|
| $H_{0.53}WO_3$     | 17.86                |
| CdS                | 8.63                 |
| $H_{0.53}WO_3/CdS$ | 25.42                |
